# Supplementary material for: Interrelationships Among Men's Threat Potential, Facial Dominance, and Vocal Dominance
Source: PubMed Central journal article supplement (PMC11383189; doi:10.1177/1474704917697332), 2017-03-09
Supplement: sj-pdf-1-evp-10.1177_1474704917697332.pdf [file sj-pdf-1-evp-10.1177_1474704917697332.pdf]

**Supplemental Materials for “Interrelationships among men’s threat potential, facial dominance, and vocal dominance”**

Supplemental Materials 1. Inter-correlations among test sessions for each trait (table shows *r* values).

| <b>Trait</b>     | <b>Mean <i>r</i> value</b> | <b>SD</b> |
|------------------|----------------------------|-----------|
| Vocal weight     | 0.80                       | 0.60      |
| Vocal strength   | 0.84                       | 0.78      |
| Vocal dominance  | 0.78                       | 0.74      |
| Facial weight    | 0.96                       | 0.84      |
| Facial strength  | 0.96                       | 0.84      |
| Facial dominance | 0.90                       | 0.78      |

Supplemental Materials 2. Inter-correlations among all individual variables. Table shows *r* values (2-tailed *p* values in parentheses)

|                                | Facial dominance rating | Facial strength rating | Facial weight rating | Vocal dominance rating | Vocal strength rating | Vocal weight rating | Height        | Weight        | Dominant handgrip strength |
|--------------------------------|-------------------------|------------------------|----------------------|------------------------|-----------------------|---------------------|---------------|---------------|----------------------------|
| Facial strength rating         | .92<br>(.001)           |                        |                      |                        |                       |                     |               |               |                            |
| Facial weight rating           | .32<br>(.037)           | .54<br>(.001)          |                      |                        |                       |                     |               |               |                            |
| Vocal dominance rating         | .14<br>(.354)           | .22<br>(.159)          | .09<br>(.555)        |                        |                       |                     |               |               |                            |
| Vocal strength rating          | .33<br>(.028)           | .40<br>(.007)          | .18<br>(.251)        | .86<br>(.001)          |                       |                     |               |               |                            |
| Vocal weight rating            | .39<br>(.009)           | .49<br>(.001)          | .34<br>(.024)        | .53<br>(.001)          | .80<br>(.001)         |                     |               |               |                            |
| Height                         | -.01<br>(.935)          | .02<br>(.878)          | .01<br>(.939)        | .08<br>(.602)          | .04<br>(.782)         | .07<br>(.666)       |               |               |                            |
| Weight                         | .15<br>(.320)           | .32<br>(.033)          | .78<br>(.001)        | .02<br>(.878)          | .04<br>(.783)         | .28<br>(.063)       | .25<br>(.107) |               |                            |
| Dominant handgrip strength     | .20<br>(.196)           | .26<br>(.090)          | .23<br>(.137)        | -.04<br>(.822)         | -.13<br>(.389)        | -.10<br>(.521)      | .25<br>(.100) | .43<br>(.004) |                            |
| Non-dominant handgrip strength | .20<br>(.206)           | .26<br>(.086)          | .20<br>(.186)        | -.07<br>(.640)         | -.11<br>(.466)        | -.02<br>(.904)      | .38<br>(.010) | .46<br>(.002) | .87<br>(.001)              |
